# Supplementary material for: KDM2A and KDM3B as Potential Targets for the Rescue of F508del-CFTR
Source: MDPI journal article supplement (doi:10.3390/ijms23179612), 2022-08-25
Supplement: s1 [file s1]

**A**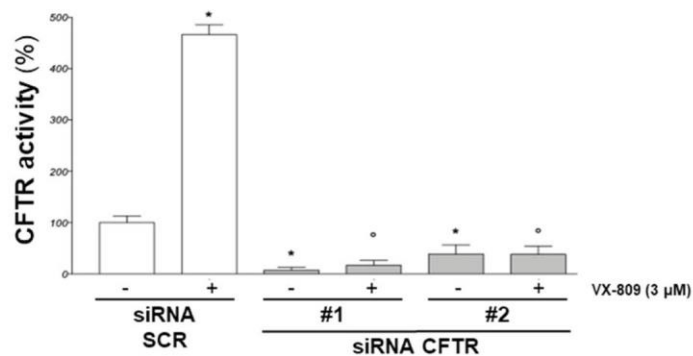**B**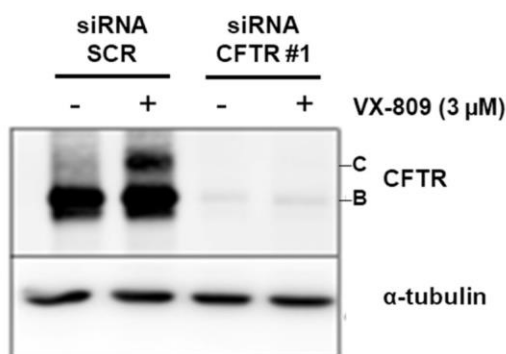**C**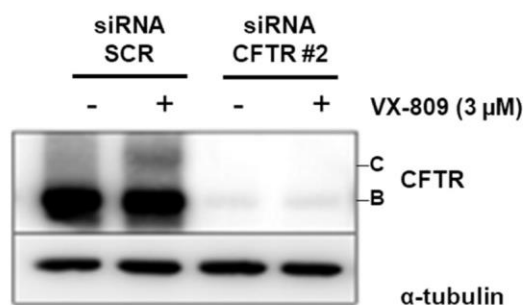

**Fig. S1. Validation of YFP-assay**

CFBE41o- cells overexpressing F508del-CFTR were transfected with two different siRNA targeting CFTR or with a scrambled siRNA. After 24 h cells were treated with 3 μM VX-809 or with the vehicle (DMSO) for a further 24 h. (A) The panel indicates the CFTR activity as a percentage of control (SCR) (means  $\pm$  SD values,  $n = 8$ ; \* $p < 0.05$  vs SCR). (B) and (C) show the western blotting of cell lysates treated as in A and analyzed with anti-CFTR antibody.  $\alpha$ -tubulin was used as loading control.

**A**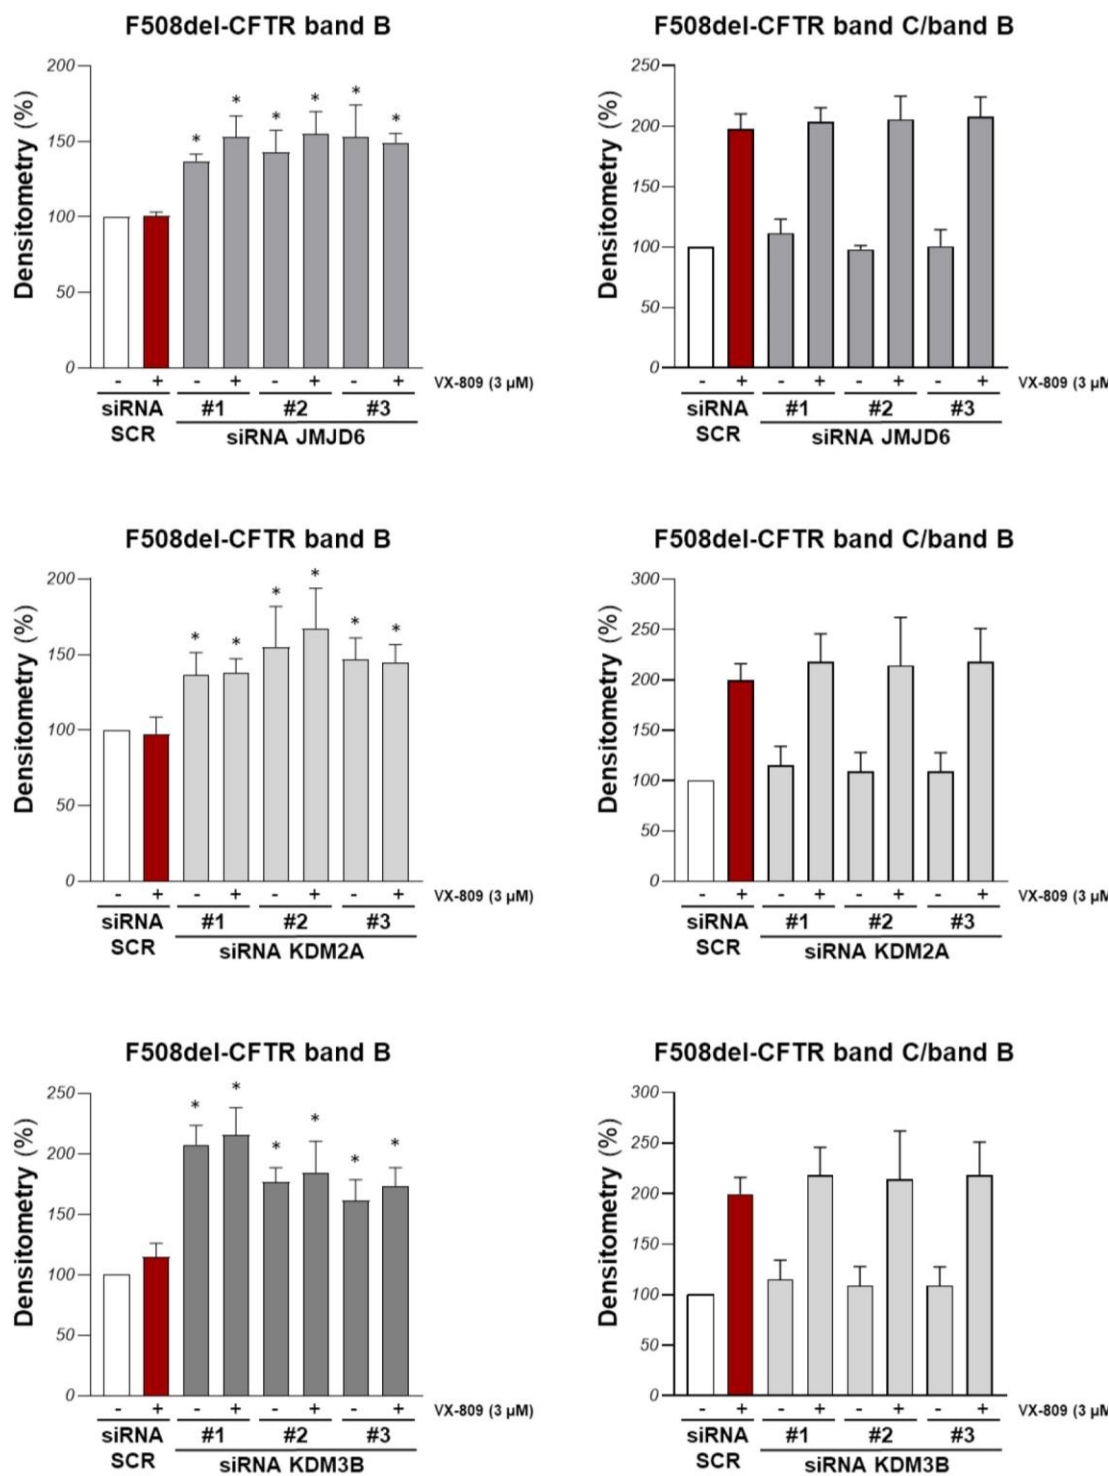

**Fig. S2. Densitometric analysis of western blot experiment in Fig. 2B**

The graphs report the densitometric quantification of immunostained F508del-CFTR band B (left panel) or F508del-CFTR band C/band B ratio (right panel) relative to the experiment described in Fig. 2B. In the case of F508del-CFTR band B quantification, the densitometric quantification of the immunostained band B was normalized by  $\alpha$ -tubulin expression, and expressed as a percentage of the control cells (SCR) (means  $\pm$  SD values,  $n=4$ ; \* $p < 0.05$  vs SCR). In the case of F508del-CFTR band C/band B quantification, the densitometric value of the immunostained band C was normalized by band B expression, and expressed as a percentage of the control cells (SCR) (means  $\pm$  SD values,  $n=4$ ; \* $p < 0.05$  vs SCR for cells treated with DMSO, # $p < 0.05$  vs SCR+VX-809 for cells treated with VX-809).
